# Supplementary material for: Relationship between Egg Consumption and Body Composition as Well as Serum Cholesterol Level: Korea National Health and Nutrition Examination Survey 2008–2011
Source: MDPI journal article supplement (doi:10.3390/jcm10245918), 2021-12-16
Supplement: s1 [file s1]

**Table S1.** General characteristics according to egg consumption in men (24-hour dietary recall)

| Characteristics                                    | Total         | <1/day        | ≥1/day        | p-Value <sup>a</sup> |
|----------------------------------------------------|---------------|---------------|---------------|----------------------|
| Age, years                                         | 44.15±0.33    | 48.45±0.40    | 40.28±0.35    | <0.001               |
| FM, kg                                             | 15.52±0.12    | 15.13±0.15    | 15.88±0.15    | <0.001               |
| PBF, %                                             | 21.92±0.13    | 21.79±0.17    | 22.04±0.15    | 0.155                |
| PBF ≥25%                                           | 255 (4.62)    | 111 (3.81)    | 144 (5.52)    | 0.002                |
| FFM, kg                                            | 51.21±0.13    | 50.28±0.16    | 52.05±0.16    | <0.001               |
| FtoM                                               | 0.30±0.002    | 0.30±0.002    | 0.30±0.002    | 0.222                |
| BMI, kg/m <sup>2</sup>                             | 24.03±0.058   | 23.85±0.077   | 24.19±0.080   | 0.001                |
| BMI ≥25 kg/m <sup>2</sup>                          | 1,948 (35.28) | 968 (33.21)   | 980 (37.59)   | 0.001                |
| WC, cm                                             | 83.98±0.17    | 84.07±0.22    | 83.91±0.23    | 0.595                |
| WC ≥90 cm                                          | 1,454 (26.33) | 772 (26.48)   | 682 (26.16)   | 0.785                |
| TC, mg/dL                                          | 186.67±0.61   | 186.69±0.85   | 186.66±0.85   | 0.985                |
| TC ≥200 mg/dL                                      | 1,841 (33.89) | 942 (32.96)   | 899 (34.91)   | 0.129                |
| TG, mg/dL <sup>b</sup>                             | 124.58±1.01   | 127.67±1.01   | 121.87±1.02   | 0.015                |
| TG ≥150 mg/dL                                      | 2,003 (36.81) | 1,087 (37.97) | 916 (35.53)   | 0.063                |
| HDL-C, mg/dL                                       | 46.18±0.20    | 45.97±0.29    | 46.37±0.26    | 0.287                |
| HDL-C <40 mg/dL                                    | 1,831 (33.70) | 1,002 (35.06) | 829 (32.19)   | 0.026                |
| LDL-C, mg/dL                                       | 112.86±0.96   | 111.72±1.50   | 113.74±1.34   | 0.332                |
| LDL-C ≥130 mg/dL                                   | 436 (27.53)   | 200 (26.25)   | 236 (28.71)   | 0.273                |
| Dyslipidemia                                       | 454 (8.22)    | 254 (8.71)    | 200 (7.67)    | 0.159                |
| Hypertension                                       | 1,240 (22.46) | 778 (26.69)   | 462 (17.72)   | <0.001               |
| Diabetes mellitus                                  | 473 (8.57)    | 323 (11.08)   | 150 (5.75)    | <0.001               |
| Stroke                                             | 129 (2.34)    | 87 (2.98)     | 42 (1.61)     | 0.001                |
| Myocardial infarction                              | 57 (1.03)     | 42 (1.44)     | 15 (0.58)     | 0.001                |
| Angina pectoris                                    | 103 (1.87)    | 73 (2.50)     | 30 (1.15)     | <0.001               |
| Predicted 10-year risk of a first hard ASCVD event | 0.065±0.001   | 0.088±0.002   | 0.044±0.001   | <0.001               |
| Nutritional intake                                 |               |               |               |                      |
| Total energy intake, kcal/day                      | 2327.45±14.96 | 2126.18±19.01 | 2509.11±19.79 | <0.001               |
| Protein intake, g/day                              | 84.71±0.77    | 75.14±1.01    | 93.34±0.99    | <0.001               |
| Water intake/body weight, g/kg/day                 | 16.38±0.17    | 14.78±0.22    | 17.83±0.25    | <0.001               |
| Smoking                                            |               |               |               | <0.001               |
| None                                               | 1,244 (22.53) | 628 (21.54)   | 616 (23.63)   |                      |
| Past                                               | 2,029 (36.74) | 1,149 (39.42) | 880 (33.76)   |                      |
| Current                                            | 2,249 (40.73) | 1,138 (39.04) | 1,111 (42.62) |                      |
| Alcohol drinking                                   |               |               |               | <0.001               |
| <1 time/month                                      | 1,420 (25.72) | 833 (28.58)   | 587 (22.52)   |                      |
| ≥1 time/month                                      | 4,102 (74.28) | 2,082 (71.42) | 2,020 (77.48) |                      |
| Physical activity                                  |               |               |               | 0.376                |
| Low                                                | 1,531 (27.73) | 785 (26.93)   | 746 (28.62)   |                      |
| Moderate                                           | 2,153 (38.99) | 1,150 (39.45) | 1,003 (38.47) |                      |
| High                                               | 1,838 (33.29) | 980 (33.62)   | 858 (32.91)   |                      |

|             |               |               |               |        |
|-------------|---------------|---------------|---------------|--------|
| Education   |               |               |               | <0.001 |
| 0-6 years   | 896 (16.23)   | 696 (23.88)   | 200 (7.67)    |        |
| 7-12 years  | 2,317 (41.96) | 1,313 (45.04) | 1,004 (38.51) |        |
| ≥13 years   | 2,309 (41.81) | 906 (31.08)   | 1,403 (53.82) |        |
| Income      |               |               |               | <0.001 |
| Q1          | 1,305 (23.63) | 748 (25.66)   | 557 (21.37)   |        |
| Q2          | 1,438 (26.04) | 785 (26.93)   | 653 (25.05)   |        |
| Q3          | 1,386 (25.10) | 712 (24.43)   | 674 (25.85)   |        |
| Q4          | 1,393 (25.23) | 670 (22.98)   | 723 (27.73)   |        |
| Survey year |               |               |               | <0.001 |
| 2008        | 950 (17.20)   | 547 (18.77)   | 403 (15.46)   |        |
| 2009        | 2,168 (39.26) | 1,179 (40.45) | 989 (37.94)   |        |
| 2010        | 1,715 (31.06) | 830 (28.47)   | 885 (33.95)   |        |
| 2011        | 689 (12.48)   | 359 (12.32)   | 330 (12.66)   |        |

FM, fat mass; PBF, percentage body fat; FFM, fat-free mass; FtoM, fat-to-muscle ratio; BMI, body mass index; WC, waist circumference; TC, total cholesterol; TG, triglyceride; HDL-C, high-density lipoprotein cholesterol; LDL-C, low-density lipoprotein cholesterol; ASCVD, atherosclerotic cardiovascular disease. Data are presented as means ± standard error for continuous variables and numbers (%) for categorical variables. <sup>a</sup> *p*-value from linear regression analysis for continuous variables or  $\chi^2$  test for categorical variables, comparing differences between two groups. <sup>b</sup> Geometric mean ± standard error.

**Table S2.** General characteristics according to egg consumption in women (24-hour dietary recall)

| Characteristics           | Total         | <1/day        | ≥1/day        | <i>p</i> -Value <sup>a</sup> |
|---------------------------|---------------|---------------|---------------|------------------------------|
| Age, years                | 44.69±0.28    | 48.75±0.38    | 40.48±0.29    | <0.001                       |
| FM, kg                    | 19.01±0.10    | 19.10±0.13    | 18.92±0.13    | 0.267                        |
| PBF, %                    | 32.85±0.12    | 33.07±0.14    | 32.62±0.14    | 0.006                        |
| PBF ≥30%                  | 261 (3.33)    | 141 (3.35)    | 120 (3.30)    | 0.895                        |
| FFM, kg                   | 35.99±0.081   | 35.86±0.09    | 36.13±0.11    | 0.032                        |
| FtoM                      | 0.53±0.002    | 0.53±0.003    | 0.52±0.003    | 0.016                        |
| BMI, kg/m <sup>2</sup>    | 23.20±0.058   | 23.47±0.075   | 22.92±0.080   | <0.001                       |
| BMI ≥25 kg/m <sup>2</sup> | 2,226 (28.38) | 1,312 (31.19) | 914 (25.12)   | <0.001                       |
| WC, cm                    | 77.68±0.18    | 78.83±0.23    | 76.49±0.23    | <0.001                       |
| WC ≥85 cm                 | 1,978 (25.22) | 1,223 (29.08) | 755 (20.75)   | <0.001                       |
| TC, mg/dL                 | 185.80±0.53   | 188.71±0.69   | 182.84±0.68   | <0.001                       |
| TC ≥200 mg/dL             | 2,675 (35.07) | 1,563 (38.46) | 1,112 (31.21) | <0.001                       |
| TG, mg/dL <sup>b</sup>    | 91.31±1.01    | 97.37±1.01    | 85.53±1.01    | <0.001                       |
| TG ≥150 mg/dL             | 1,582 (20.71) | 996 (24.47)   | 586 (16.41)   | <0.001                       |
| HDL-C, mg/dL              | 51.30±0.18    | 50.61±0.23    | 51.99±0.23    | <0.001                       |
| HDL-C <50 mg/dL           | 3,944 (51.71) | 2,244 (55.22) | 1,700 (47.71) | <0.001                       |
| LDL-C, mg/dL              | 109.96±0.90   | 111.98±1.30   | 108.14±1.21   | 0.030                        |
| LDL-C ≥130 mg/dL          | 464 (26.51)   | 249 (28.92)   | 215 (24.18)   | 0.025                        |
| Dyslipidemia              | 756 (9.64)    | 468 (11.13)   | 288 (7.92)    | <0.001                       |
| Hypertension              | 1,517 (19.34) | 1,037 (24.66) | 480 (13.19)   | <0.001                       |
| Diabetes mellitus         | 504 (6.43)    | 348 (8.27)    | 156 (4.29)    | <0.001                       |
| Stroke                    | 117 (1.49)    | 87 (2.07)     | 30 (0.82)     | <0.001                       |
| Myocardial infarction     | 35 (0.45)     | 26 (0.62)     | 9 (0.25)      | 0.014                        |

|                                                    |               |               |               |        |
|----------------------------------------------------|---------------|---------------|---------------|--------|
| Angina pectoris                                    | 103 (1.31)    | 72 (1.71)     | 31 (0.85)     | 0.001  |
| Predicted 10-year risk of a first hard ASCVD event | 0.035±0.001   | 0.049±0.001   | 0.021±0.001   | <0.001 |
| Nutritional intake                                 |               |               |               |        |
| Total energy intake, kcal/day                      | 1670.27±9.70  | 1561.29±11.26 | 1782.84±14.08 | <0.001 |
| Protein intake, g/day                              | 59.55±0.46    | 53.38±0.55    | 65.92±0.63    | <0.001 |
| Water intake/body weight, g/kg/day                 | 15.06±0.16    | 13.77±0.20    | 16.39±0.21    | <0.001 |
| Smoking                                            |               |               |               | 0.065  |
| None                                               | 7,165 (91.34) | 3,853 (91.61) | 3,312 (91.04) |        |
| Past                                               | 298 (3.80)    | 141 (3.35)    | 157 (4.32)    |        |
| Current                                            | 381 (4.86)    | 212 (5.04)    | 169 (4.65)    |        |
| Alcohol drinking                                   |               |               |               | <0.001 |
| <1 time/month                                      | 4,742 (60.45) | 2,718 (64.62) | 2,024 (55.63) |        |
| ≥1 time/month                                      | 3,102 (39.55) | 1,488 (35.38) | 1,614 (44.37) |        |
| Physical activity                                  |               |               |               | <0.001 |
| Low                                                | 2,588 (32.99) | 1,297 (30.84) | 1,291 (35.49) |        |
| Moderate                                           | 3,363 (42.87) | 1,844 (43.84) | 1,519 (41.75) |        |
| High                                               | 1,893 (24.13) | 1,065 (25.32) | 828 (22.76)   |        |
| Education                                          |               |               |               | <0.001 |
| 0-6 years                                          | 2,275 (29.00) | 1,729 (41.11) | 546 (15.01)   |        |
| 7-12 years                                         | 3,140 (40.03) | 1,582 (37.61) | 1,558 (42.83) |        |
| ≥13 years                                          | 2,429 (30.97) | 895 (21.28)   | 1,534 (42.17) |        |
| Income                                             |               |               |               | <0.001 |
| Q1                                                 | 1,898 (24.20) | 1,085 (25.80) | 813 (22.35)   |        |
| Q2                                                 | 2,021 (25.76) | 1,118 (26.58) | 903 (24.82)   |        |
| Q3                                                 | 2,006 (25.57) | 1,067 (25.37) | 939 (25.81)   |        |
| Q4                                                 | 1,919 (24.46) | 936 (22.25)   | 983 (27.02)   |        |
| Survey year                                        |               |               |               | <0.001 |
| 2008                                               | 1,489 (18.98) | 878 (20.87)   | 611 (16.79)   |        |
| 2009                                               | 2,975 (37.93) | 1,614 (38.37) | 1,361 (37.41) |        |
| 2010                                               | 2,396 (30.55) | 1,225 (29.13) | 1,171 (32.19) |        |
| 2011                                               | 984 (12.54)   | 489 (11.63)   | 495 (13.61)   |        |

FM, fat mass; PBF, percentage body fat; FFM, fat-free mass; FtoM, fat-to-muscle ratio; BMI, body mass index; WC, waist circumference; TC, total cholesterol; TG, triglyceride; HDL-C, high-density lipoprotein cholesterol; LDL-C, low-density lipoprotein cholesterol; ASCVD, atherosclerotic cardiovascular disease. Data are presented as means ± standard error for continuous variables and numbers (%) for categorical variables. <sup>a</sup> *p*-value from linear regression analysis for continuous variables or  $\chi^2$  test for categorical variables, comparing differences between two groups. <sup>b</sup> Geometric mean ± standard error.

**Table S3.** Association between serum cholesterol level, prevalence of dyslipidemia, and egg consumption in men (24-hour dietary recall)

| Sex | Outcome | Characteristics | Crude      | Age-adjusted | Multivariable <sup>a</sup> | <i>p</i> -Value <sup>a</sup> |
|-----|---------|-----------------|------------|--------------|----------------------------|------------------------------|
| Men | TC      | Egg consumption |            |              |                            |                              |
|     |         | <1/day          | reference  | reference    | reference                  | reference                    |
|     |         | ≥1/day          | -0.02±1.19 | 2.16±1.22    | 0.60±1.22                  | 0.622                        |

|                       |                 |        |                     |                     |                     |           |
|-----------------------|-----------------|--------|---------------------|---------------------|---------------------|-----------|
| TG <sup>b</sup>       | Egg consumption | <1/day | reference           | reference           | reference           | reference |
|                       |                 | ≥1/day | -0.046±0.019        | 0.001±0.019         | -0.025±0.019        | 0.185     |
| HDL-C                 | Egg consumption | <1/day | reference           | reference           | reference           | reference |
|                       |                 | ≥1/day | 0.40±0.37           | -0.09±0.38          | 0.039±0.37          | 0.915     |
| LDL-C                 | Egg consumption | <1/day | reference           | reference           | reference           | reference |
|                       |                 | ≥1/day | 2.01±2.07           | 4.01±2.11           | 3.54±2.08           | 0.089     |
| Dyslipidemia          | Egg consumption | <1/day | reference           | reference           | reference           | reference |
|                       |                 | ≥1/day | 0.79 (0.63 to 0.99) | 1.13 (0.88 to 1.45) | 0.98 (0.76 to 1.26) | 0.855     |
| Hypertension          | Egg consumption | <1/day | reference           | reference           | reference           | reference |
|                       |                 | ≥1/day | 0.60 (0.51 to 0.71) | 1.14 (0.94 to 1.38) | 1.05 (0.86 to 1.28) | 0.639     |
| Diabetes mellitus     | Egg consumption | <1/day | reference           | reference           | reference           | reference |
|                       |                 | ≥1/day | 0.46 (0.36 to 0.59) | 0.80 (0.60 to 1.05) | 0.81 (0.60 to 1.09) | 0.169     |
| Stroke                | Egg consumption | <1/day | reference           | reference           | reference           | reference |
|                       |                 | ≥1/day | 0.50 (0.31 to 0.81) | 1.05 (0.62 to 1.77) | 1.26 (0.72 to 2.23) | 0.421     |
| Myocardial infarction | Egg consumption | <1/day | reference           | reference           | reference           | reference |
|                       |                 | ≥1/day | 0.49 (0.22 to 1.07) | 0.94 (0.44 to 1.98) | 0.98 (0.43 to 2.23) | 0.965     |
| Angina pectoris       | Egg consumption | <1/day | reference           | reference           | reference           | reference |
|                       |                 | ≥1/day | 0.40 (0.23 to 0.69) | 0.80 (0.44 to 1.47) | 0.71 (0.40 to 1.27) | 0.248     |

TC, total cholesterol; TG, triglyceride; HDL-C, high-density lipoprotein cholesterol; LDL-C, low-density lipoprotein cholesterol.

Data are presented as beta coefficient ± standard error or odds ratio (95% confidence interval). <sup>a</sup> Multivariable linear (TC, TG, HDL-C, and LDL-C) or logistic (dyslipidemia, hypertension, diabetes mellitus, stroke, myocardial infarction, and angina pectoris) regression model adjusted for age, body mass index status, total energy intake, protein intake, water intake per body weight, smoking, alcohol drinking, physical activity, education, income, and survey year. <sup>b</sup> Log-transformed.

**Table S4.** Association between serum cholesterol level, prevalence of dyslipidemia, and egg consumption in women (24-hour dietary recall)

| Sex   | Outcome               | Characteristics | Crude               | Age-adjusted        | Multivariable <sup>a</sup> | p-Value <sup>a</sup> |
|-------|-----------------------|-----------------|---------------------|---------------------|----------------------------|----------------------|
| Women | TC                    | Egg consumption |                     |                     |                            |                      |
|       |                       | <1/day          | reference           | reference           | reference                  | reference            |
|       |                       | ≥1/day          | -5.88±0.88          | 0.53±0.88           | 0.54±0.87                  | 0.530                |
|       | TG <sup>b</sup>       | Egg consumption |                     |                     |                            |                      |
|       |                       | <1/day          | reference           | reference           | reference                  | reference            |
|       |                       | ≥1/day          | -0.13±0.016         | -0.022±0.015        | -0.005±0.014               | 0.679                |
|       | HDL-C                 | Egg consumption |                     |                     |                            |                      |
|       |                       | <1/day          | reference           | reference           | reference                  | reference            |
|       |                       | ≥1/day          | 1.38±0.30           | 0.14±0.31           | -0.18±0.31                 | 0.558                |
|       | LDL-C                 | Egg consumption |                     |                     |                            |                      |
|       |                       | <1/day          | reference           | reference           | reference                  | reference            |
|       |                       | ≥1/day          | -3.83±1.76          | 0.72±1.73           | 1.74±1.66                  | 0.295                |
|       | Dyslipidemia          | Egg consumption |                     |                     |                            |                      |
|       |                       | <1/day          | reference           | reference           | reference                  | reference            |
|       |                       | ≥1/day          | 0.63 (0.53 to 0.76) | 1.10 (0.89 to 1.34) | 1.03 (0.84 to 1.27)        | 0.765                |
|       | Hypertension          | Egg consumption |                     |                     |                            |                      |
|       |                       | <1/day          | reference           | reference           | reference                  | reference            |
|       |                       | ≥1/day          | 0.49 (0.42 to 0.56) | 1.16 (0.98 to 1.38) | 1.20 (1.00 to 1.43)        | 0.044                |
|       | Diabetes mellitus     | Egg consumption |                     |                     |                            |                      |
|       |                       | <1/day          | reference           | reference           | reference                  | reference            |
|       |                       | ≥1/day          | 0.58 (0.46 to 0.74) | 1.11 (0.85 to 1.44) | 1.14 (0.88 to 1.48)        | 0.304                |
|       | Stroke                | Egg consumption |                     |                     |                            |                      |
|       |                       | <1/day          | reference           | reference           | reference                  | reference            |
|       |                       | ≥1/day          | 0.33 (0.20 to 0.53) | 0.71 (0.42 to 1.19) | 0.73 (0.42 to 1.27)        | 0.264                |
|       | Myocardial infarction | Egg consumption |                     |                     |                            |                      |
|       |                       | <1/day          | reference           | reference           | reference                  | reference            |
|       |                       | ≥1/day          | 0.39 (0.15 to 0.99) | 0.76 (0.28 to 2.07) | 0.89 (0.34 to 2.37)        | 0.818                |
|       | Angina pectoris       | Egg consumption |                     |                     |                            |                      |
|       |                       | <1/day          | reference           | reference           | reference                  | reference            |
|       |                       | ≥1/day          | 0.51 (0.30 to 0.85) | 1.00 (0.57 to 1.77) | 1.10 (0.65 to 1.85)        | 0.725                |

TC, total cholesterol; TG, triglyceride; HDL-C, high-density lipoprotein cholesterol; LDL-C, low-density lipoprotein cholesterol; NA, not applicable. Data are presented as beta coefficient ± standard error or odds ratio (95% confidence interval). <sup>a</sup> Multivariable linear (TC, TG, HDL-C, and LDL-C) or logistic (dyslipidemia, hypertension, diabetes mellitus, stroke, myocardial infarction, and angina pectoris) regression model adjusted for age, body mass index status, total energy intake, protein intake, water intake per body weight, smoking, alcohol drinking, physical activity, education, income, and survey year. <sup>b</sup> Log-transformed.

**Table S5.** Association between body composition, waist circumference, and egg consumption in men (24-hour dietary recall)

| Sex | Outcome             | Characteristics | Crude       | Age-adjusted | Multivariable <sup>a</sup> | p-Value <sup>a</sup> |
|-----|---------------------|-----------------|-------------|--------------|----------------------------|----------------------|
| Men | Fat mass            | Egg consumption |             |              |                            |                      |
|     |                     | <1/day          | reference   | reference    | reference                  | reference            |
|     |                     | ≥1/day          | 0.75±0.19   | 0.58±0.20    | 0.093±0.10                 | 0.361                |
|     | Percentage body fat | Egg consumption |             |              |                            |                      |
|     |                     | <1/day          | reference   | reference    | reference                  | reference            |
|     |                     | ≥1/day          | 0.25±0.18   | 0.50±0.19    | 0.17±0.13                  | 0.192                |
|     | Fat-free mass       | Egg consumption |             |              |                            |                      |
|     |                     | <1/day          | reference   | reference    | reference                  | reference            |
|     |                     | ≥1/day          | 1.77±0.20   | 0.69±0.21    | -0.074±0.15                | 0.618                |
|     | Fat-to-muscle ratio | Egg consumption |             |              |                            |                      |
|     |                     | <1/day          | reference   | reference    | reference                  | reference            |
|     |                     | ≥1/day          | 0.003±0.003 | 0.007±0.003  | 0.002±0.002                | 0.391                |
|     | Waist circumference | Egg consumption |             |              |                            |                      |
|     |                     | <1/day          | reference   | reference    | reference                  | reference            |
|     |                     | ≥1/day          | -0.15±0.29  | 0.72±0.30    | -0.12±0.14                 | 0.396                |

Data are presented as beta coefficient ± standard error. <sup>a</sup> Multivariable linear regression model adjusted for age, body mass index status, total energy intake, protein intake, water intake per body weight, smoking, alcohol drinking, physical activity, education, income, and survey year.

**Table S6.** Association between body composition, waist circumference, and egg consumption in women (24-hour dietary recall)

| Sex   | Outcome             | Characteristics | Crude        | Age-adjusted | Multivariable <sup>a</sup> | p-Value <sup>a</sup> |
|-------|---------------------|-----------------|--------------|--------------|----------------------------|----------------------|
| Women | Fat mass            | Egg consumption |              |              |                            |                      |
|       |                     | <1/day          | reference    | reference    | reference                  | reference            |
|       |                     | ≥1/day          | -0.19±0.17   | 0.097±0.17   | 0.087±0.072                | 0.230                |
|       | Percentage body fat | Egg consumption |              |              |                            |                      |
|       |                     | <1/day          | reference    | reference    | reference                  | reference            |
|       |                     | ≥1/day          | -0.45±0.16   | 0.10±0.16    | 0.11±0.11                  | 0.330                |
|       | Fat-free mass       | Egg consumption |              |              |                            |                      |
|       |                     | <1/day          | reference    | reference    | reference                  | reference            |
|       |                     | ≥1/day          | 0.27±0.12    | 0.025±0.12   | -0.024±0.096               | 0.801                |
|       | Fat-to-muscle ratio | Egg consumption |              |              |                            |                      |
|       |                     | <1/day          | reference    | reference    | reference                  | reference            |
|       |                     | ≥1/day          | -0.009±0.003 | 0.002±0.003  | 0.002±0.002                | 0.310                |
|       | Waist circumference | Egg consumption |              |              |                            |                      |
|       |                     | <1/day          | reference    | reference    | reference                  | reference            |
|       |                     | ≥1/day          | -2.33±0.29   | -0.19±0.27   | -0.025±0.13                | 0.839                |

Data are presented as beta coefficient ± standard error. <sup>a</sup> Multivariable linear regression model adjusted for age, body mass index status, total energy intake, protein intake, water intake per body weight, smoking, alcohol drinking, physical activity, education, income, and survey year.
